# Supplementary material for: Crystal structures of two new high-pressure oxynitrides with composition SnGe4N4O4, from single-crystal electron diffraction
Source: PubMed Central journal article supplement (PMC11157342; doi:10.1107/s2052520624002683), 2024-05-08
Supplement: b-80-00182-sup6.pdf [file b-80-00182-sup6.pdf]

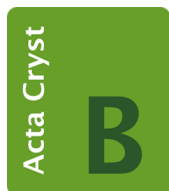

STRUCTURAL SCIENCE  
CRYSTAL ENGINEERING  
MATERIALS

Volume 80 (2024)

Supporting information for article:

**Crystal structures of two new high-pressure oxynitrides with composition  $\text{SnGe}_4\text{N}_4\text{O}_4$ , from single-crystal electron diffraction**

**Philipp Gollé-Leidreiter, Shrikant Bhat, Leonore Wiehl, Qingbo Wen, Peter Kroll, Ryo Ishikawa, Martin Etter, Robert Farla, Yuichi Ikuhara, Ralf Riedel and Ute Kolb**

## S1. Synthesis

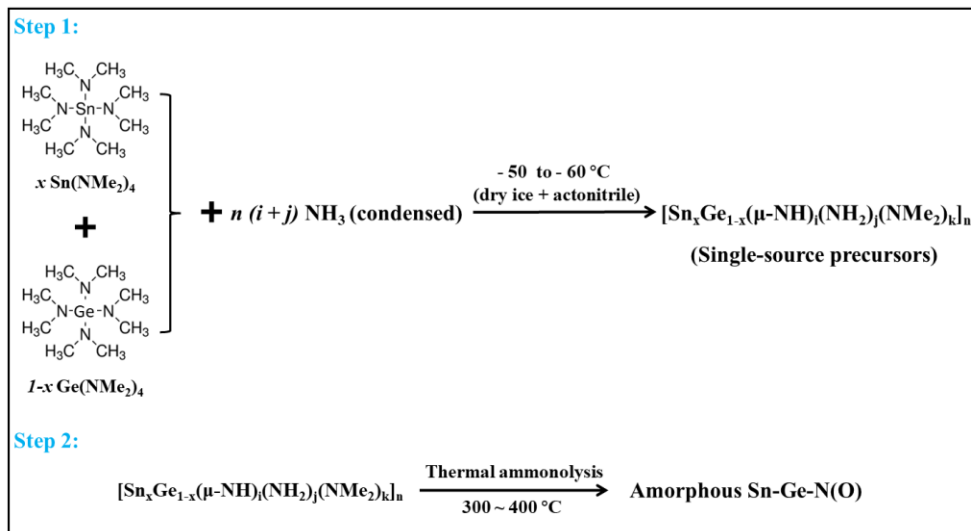

**Figure S1** Details of the synthesis of the amorphous Sn-Ge-N(O) for the high-pressure high-temperature synthesis

## S2. PXRD

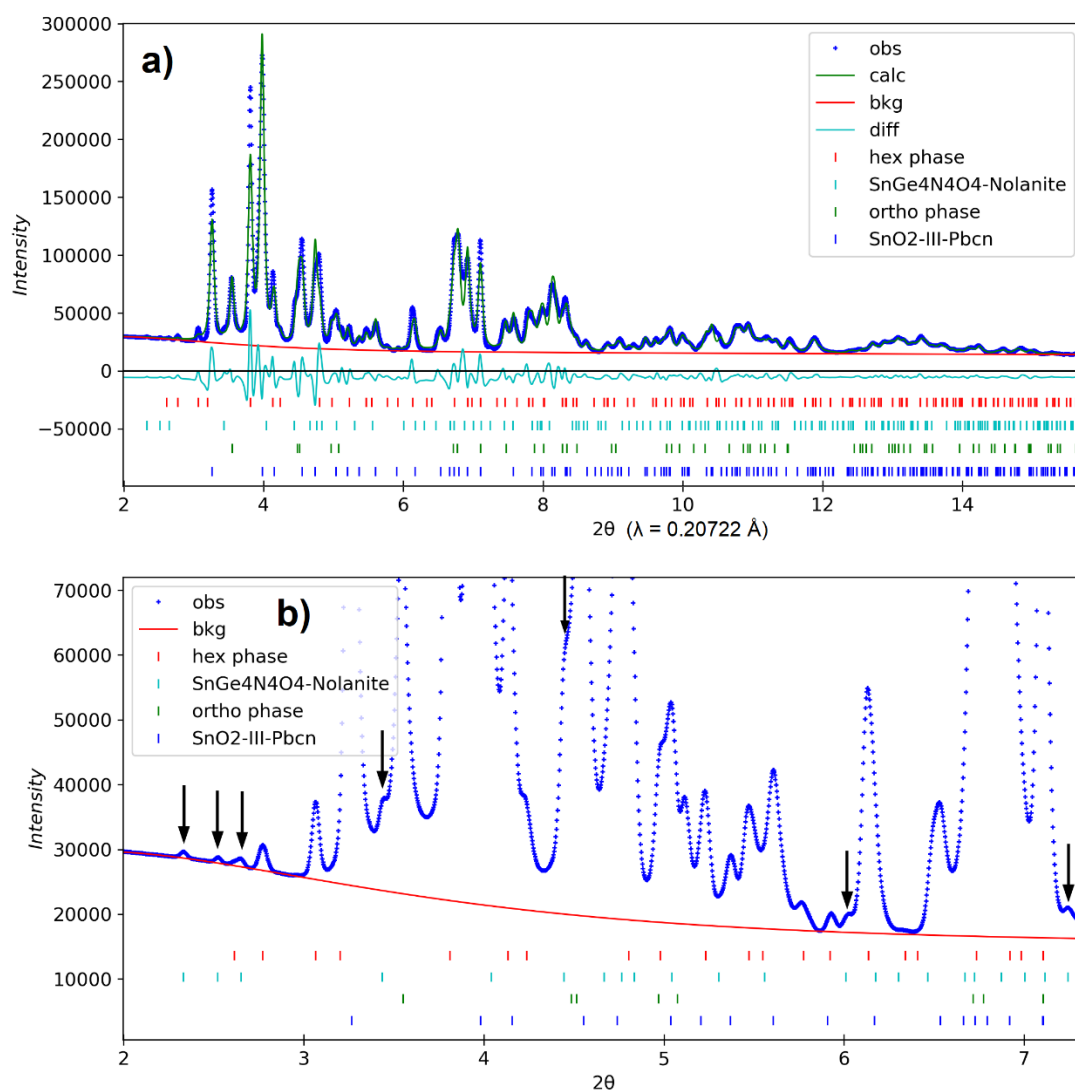

**Figure S2** (a) Powder XRD pattern of sample #HH228, measured with synchrotron radiation ( $\lambda = 0.20722 \text{ \AA}$ ), showing the Le Bail fit of a mixture of four different, partially known phases. Only a small fraction of the novel nolanite-type  $\text{SnGe}_4\text{N}_4\text{O}_4$  ( $P6_3mc$ ) is contained in this sample and the tiny reflections are scarcely visible in the full pattern. (b) Magnified section of the XRD pattern, highlighting  $\text{SnGe}_4\text{N}_4\text{O}_4$  reflections, which show no overlap with other phases (black arrows). These reflections have been used to determine the lattice parameters of this phase, namely  $a = 5.876(3) \text{ \AA}$  and  $c = 9.418(5) \text{ \AA}$ .

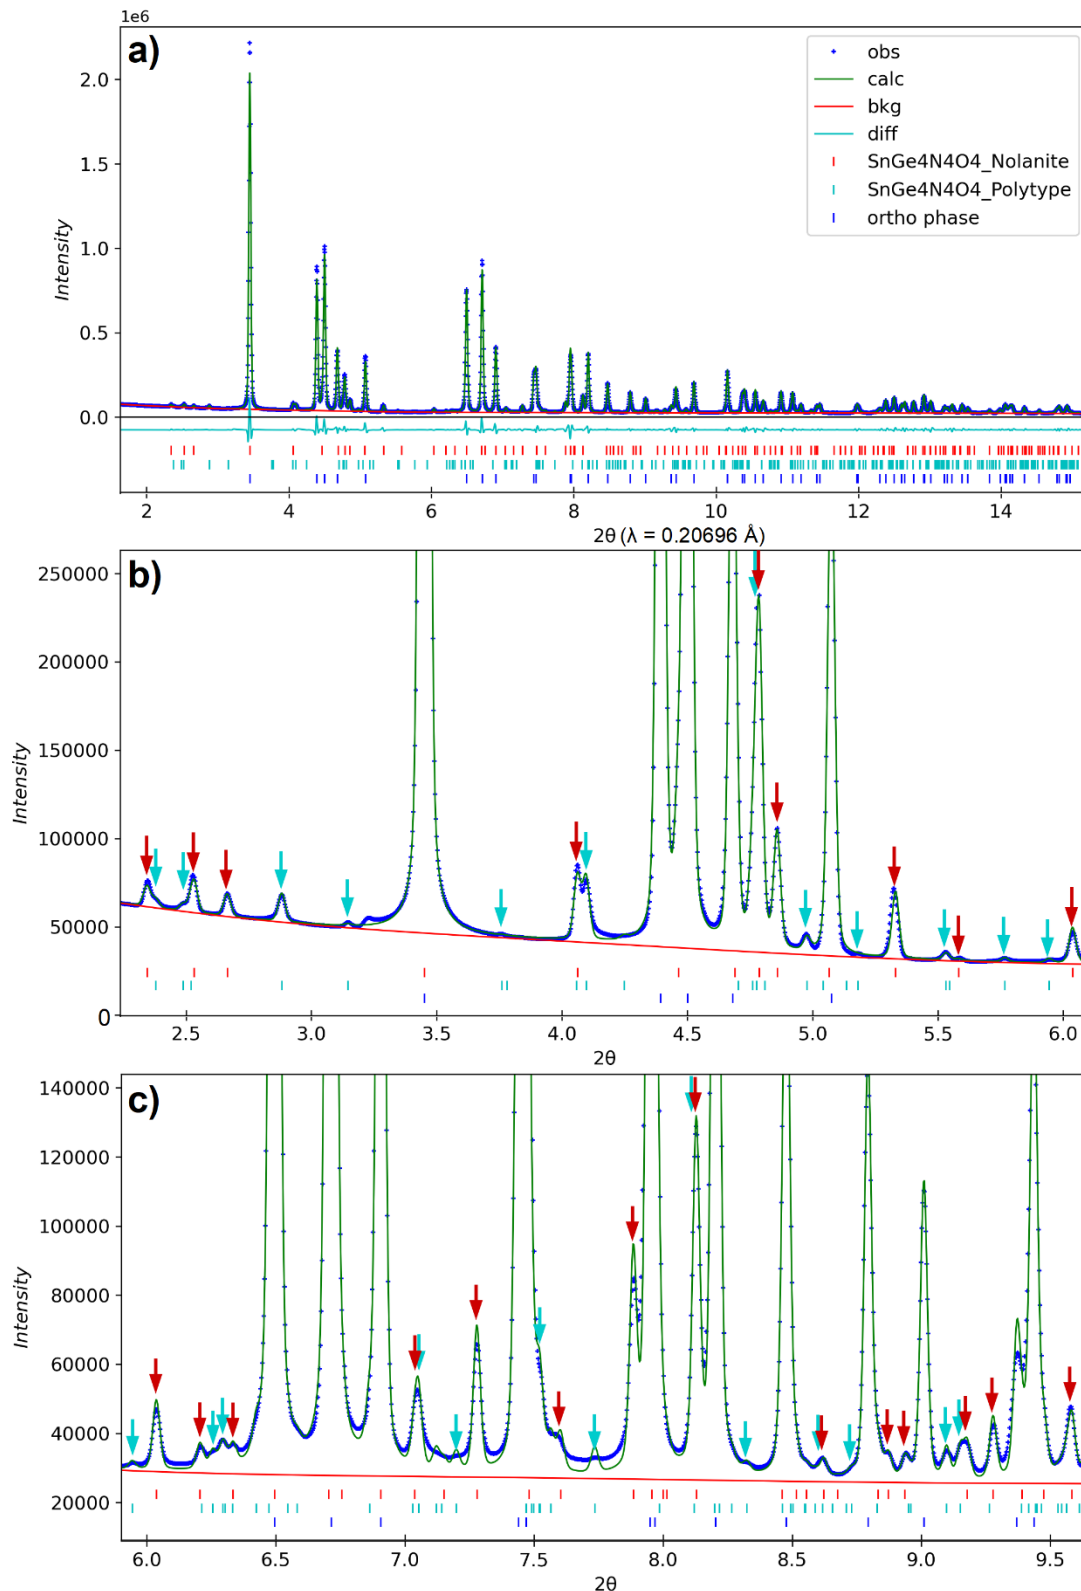

**Figure S3** Synchrotron powder XRD pattern of sample #HH266 with Le Bail fit ( $wR = 5.7\%$ ) of three phases, namely nolanite-type SnGe<sub>4</sub>N<sub>4</sub>O<sub>4</sub> ( $P6_3mc$ ), the 6R polytype of SnGe<sub>4</sub>N<sub>4</sub>O<sub>4</sub> ( $R\bar{3}m$ ) and an orthorhombic phase with still unknown structure. (a) Full pattern, dominated by the orthorhombic

phase. (b, c) Magnified sections of the pattern in the angle range up to  $2\theta = 6^\circ$  and from  $6^\circ$  to  $9.5^\circ$ , respectively. The arrows indicate reflections of the nolanite-type phase (red) and the polytype (cyan), which show no overlap with the ortho phase. Only such reflections have been used to determine the lattice parameters of the two phases, namely  $a = 5.839(1) \text{ \AA}$ ,  $c = 9.365(2) \text{ \AA}$  for the nolanite type phase, and  $a = 5.846(1) \text{ \AA}$ ,  $c = 28.230(5) \text{ \AA}$  for the polytype.

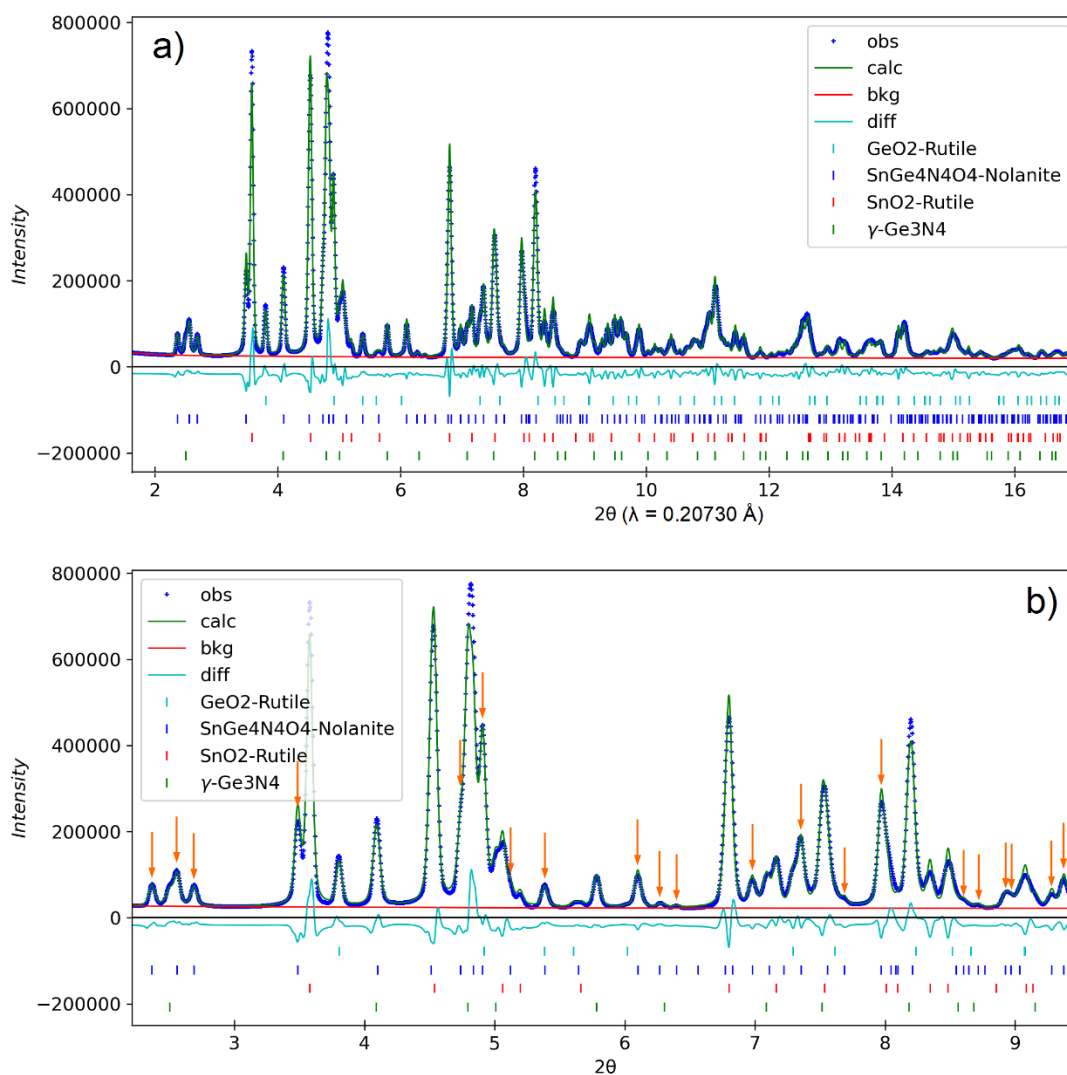

**Figure S4** (a) Synchrotron powder XRD pattern of sample #HH670 with Rietveld refinement ( $wR = 11.0\%$ ) of nolanite-type  $\text{SnGe}_4\text{N}_4\text{O}_4$  ( $P6_3mc$ , 41.0 wt%) and three other known phases, namely spinel-type  $\gamma\text{-Ge}_3\text{N}_4$  ( $Fd\text{-}3m$ , 28.9 wt%) and rutile-type ( $P4_2/mnm$ )  $\text{SnO}_2$  (24.1 wt%) and  $\text{GeO}_2$  (6.0 wt%). (b) Magnified section of the pattern in the angle range, up to  $2\theta = 9.5^\circ$ . The orange arrows indicate reflections of the nolanite-type phase, which show no overlap with other phases. The refined lattice parameters of nolanite-type  $\text{SnGe}_4\text{N}_4\text{O}_4$  are  $a = 5.791(1) \text{ \AA}$ ,  $c = 9.276(2) \text{ \AA}$ .

**Table S1** Overview of the samples investigated in this work. SnO<sub>2</sub>-III denotes the PbO<sub>2</sub>-type polymorph, while SnO<sub>2</sub>-I/GeO<sub>2</sub>-I denotes the rutile-type polymorph.

| Sample | Pressure (GPa) | Temperature (°C) | Precursor                                                                                      | Preparation of the capsule | Quantity of nolanite-type phase | Other phases present                                                                                             |
|--------|----------------|------------------|------------------------------------------------------------------------------------------------|----------------------------|---------------------------------|------------------------------------------------------------------------------------------------------------------|
| #HH228 | 20             | 1500             | Polymer derived                                                                                | Under air                  | Minor                           | SnO <sub>2</sub> -III, other novel phases (analysis in progress)                                                 |
| #HH266 | 16             | 1200             | Polymer derived                                                                                | Glovebox                   | Small                           | Other novel phases (analysis in progress)                                                                        |
| #HH670 | 15.6           | 1200             | Crystalline powder of 67 mol% Ge <sub>2</sub> N <sub>2</sub> O and 33 mol% SnO <sub>2</sub> -I | Glovebox                   | 41wt%                           | Spinel type Ge <sub>3</sub> N <sub>4</sub> (28.9 wt%), SnO <sub>2</sub> -I (24.1 wt%) GeO <sub>2</sub> -I (6wt%) |

### S3 EDX

#### S3.1 TEM-EDX

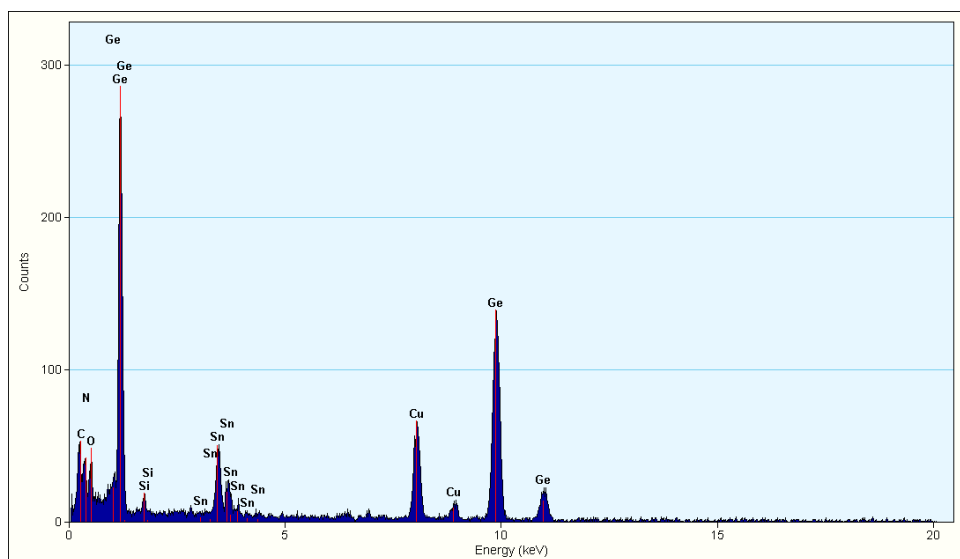

**Figure S5** EDX spectrum of Cr1\_HH228. C and Cu are contributions from the TEM grid.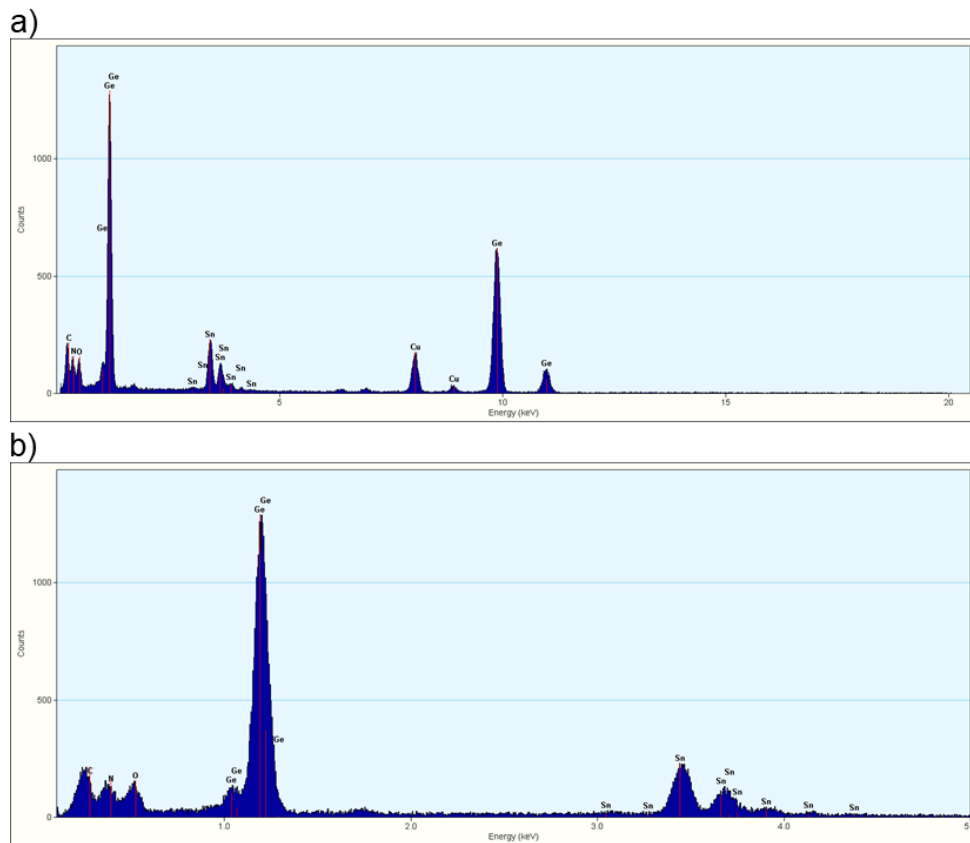**Figure S6** EDX Spectrum of the nolanite phase from HH266, a) full spectrum, b) magnified spectrum up to 6 keV. C and Cu peaks are from the TEM grid.

## S4 ADT

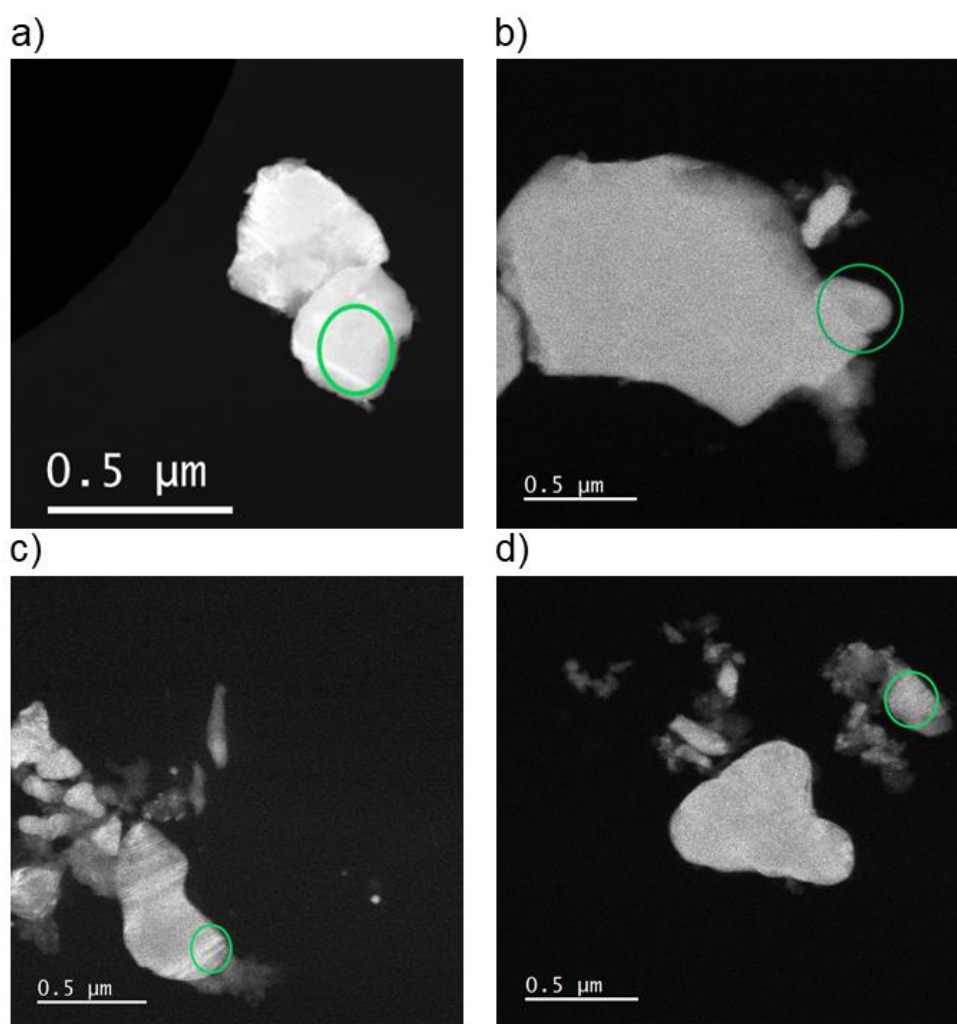

**Figure S7** HAADF-STEM Pictures of the spots where ADT data was acquired. The green ring marks the position of the beam a) Cr1\_HH228 b) Cr2\_HH266 c) Cr3\_HH266 d) Cr4\_HH266.

**Table S2** Atomic positions, displacement parameters, and symmetry information of the 6R polytype, space group  $R\bar{3}m$ , resulting from the dynamical refinement of ADT data of crystal Cr3\_HH266.

|     | $x$ | $y$ | $z$         | $U_{\text{iso}}$ | Wyckoff letter | Site symmetry |
|-----|-----|-----|-------------|------------------|----------------|---------------|
| Sn1 | 0   | 0   | 0.42707(9)  | -0.0006(7)       | 6c             | 3m            |
| Ge1 | 0   | 0   | 0.06196(13) | 0.0034(9)        | 6c             | 3m            |
| Ge2 | 0.5 | 0   | 0           | -0.0013(7)       | 9e             | .2/m          |
| Ge3 | 0.5 | 0   | 0.5         | -0.0036(7)       | 9d             | .2/m          |
| O1  | 0   | 0   | 0.7003(3)   | -0.002(2)        | 6c             | 3m            |



|    |            |           |           |             |     |           |
|----|------------|-----------|-----------|-------------|-----|-----------|
| N1 | 0          | 0         | 0.1297(3) | -0.0189(16) | 6c  | <i>3m</i> |
| N2 | 0.9793(14) | 0.4897(7) | 0.7092(2) | -0.0002(15) | 18h | <i>.m</i> |
| O2 | 0.8427(7)  | 0.1573(7) | 0.7956(2) | 0.0059(15)  | 18h | <i>.m</i> |

**Table S3** Interatomic anion-cation distances of Cr1\_HH228, *P6<sub>3</sub>mc* after dynamical refinement.

| Atom 1 | Atom 2 | Count | d 1,2 (Å) |
|--------|--------|-------|-----------|
| Sn1    | O2     | 3x    | 2.070(4)  |
|        | N2     | 3x    | 2.164(4)  |
| Ge1    | N2     | 3x    | 1.886(4)  |
|        | N1     | 1x    | 1.915(7)  |
| Ge2    | O1     | 1x    | 1.938(3)  |
|        | O2     | 2x    | 1.952(4)  |
|        | N1     | 1x    | 1.997(4)  |
|        | N2     | 2x    | 2.023(4)  |

**Table S4** Interatomic cation-cation and anion-anion distances of Cr1\_HH228, *P6<sub>3</sub>mc* after dynamical refinement.

| Atom 1 | Atom 2 | Count | d 1,2 (Å)  | Atom 1 | Atom 2 | Count | d 1,2 (Å) |
|--------|--------|-------|------------|--------|--------|-------|-----------|
| Sn1    | Ge2    | 3x    | 3.133(3)   | N1     | N2     | 3x    | 2.736(7)  |
|        | Ge1    | 3x    | 3.5076(10) |        | O2     | 6x    | 2.940(4)  |
|        | Ge2    | 6x    | 3.597(3)   |        | N2     | 3x    | 3.068(7)  |
| Ge1    | Ge2    | 9x    | 3.416(2)   | N2     | N1     | 1x    | 2.736(7)  |
|        | Sn1    | 3x    | 3.5077(9)  |        | N2     | 2x    | 2.762(6)  |
| Ge2    | Ge2    | 4x    | 2.938(2)   |        | O2     | 2x    | 2.854(5)  |
|        | Sn1    | 1x    | 3.133(3)   |        | O1     | 2x    | 2.949(2)  |
|        | Ge1    | 3x    | 3.416(2)   |        | O2     | 2x    | 3.018(5)  |
|        | Sn1    | 2x    | 3.597(2)   |        | N1     | 1x    | 3.068(7)  |
|        |        |       |            |        | N2     | 2x    | 3.114(6)  |

|  |    |    |    |          |
|--|----|----|----|----------|
|  | O1 | O2 | 3x | 2.548(6) |
|  |    | N2 | 6x | 2.949(4) |
|  |    | O2 | 3x | 3.157(7) |
|  | O2 | O1 | 1x | 2.548(6) |
|  |    | O2 | 2x | 2.765(6) |
|  |    | N2 | 2x | 2.854(5) |
|  |    | N1 | 2x | 2.940(4) |
|  |    | N2 | 2x | 3.018(5) |
|  |    | O2 | 2x | 3.111(6) |
|  |    | O1 | 1x | 3.157(7) |

**Table S5** Interatomic anion-cation distances of Cr2\_HH266,  $P6_3mc$  after dynamical refinement.

| Atom 1    | Atom 2 | Count | d 1,2 (Å) |
|-----------|--------|-------|-----------|
| Sn1 Gesn1 | O2     | 3x    | 2.069(7)  |
|           | N2     | 3x    | 2.169(8)  |
| Ge1       | N2     | 3x    | 1.875(5)  |
|           | N1     | 1x    | 1.936(2)  |
| Ge2       | O1     | 1x    | 1.923(7)  |
|           | O2     | 2x    | 1.937(7)  |
|           | N1     | 1x    | 1.969(9)  |
|           | N2     | 2x    | 2.001(7)  |

**Table S6** Interatomic cation-cation and anion-anion distances of Cr2\_HH266,  $P6_3mc$ .

| Atom 1    | Atom 2 | Count | d 1,2 (Å) | Atom 1 | Atom 2 | Count | d 1,2 (Å) |
|-----------|--------|-------|-----------|--------|--------|-------|-----------|
| Sn1 Gesn1 | Ge2    | 3x    | 3.127(6)  | N1     | N2     | 3x    | 2.694(16) |
|           | Ge1    | 3x    | 3.493(2)  |        | O2     | 6x    | 2.922(4)  |
|           | Ge2    | 6x    | 3.565(5)  |        | N2     | 3x    | 3.075(16) |
| Ge1       | Ge2    | 9x    | 3.389(5)  | N2     | N1     | 1x    | 2.694(16) |

|     |           |    |          |    |    |    |          |
|-----|-----------|----|----------|----|----|----|----------|
|     | Sn1 Gesn1 | 3x | 3.493(2) |    | N2 | 2x | 2.742(6) |
| Ge2 | Ge2       | 4x | 2.928(2) |    | O2 | 2x | 2.85(1)  |
|     | Sn1 Gesn1 | 1x | 3.127(6) |    | O1 | 2x | 2.931(3) |
|     | Ge1       | 3x | 3.389(4) |    | O2 | 2x | 2.937(9) |
|     | Sn1 Gesn1 | 2x | 3.565(4) |    | N1 | 1x | 3.075(2) |
|     |           |    |          |    | N2 | 2x | 3.097(6) |
|     |           |    |          | O1 | O2 | 3x | 2.51(1)  |
|     |           |    |          |    | N2 | 6x | 2.931(3) |
|     |           |    |          |    | O2 | 3x | 3.132(3) |
|     |           |    |          | O2 | O1 | 1x | 2.51(1)  |
|     |           |    |          |    | O2 | 2x | 2.699(7) |
|     |           |    |          |    | N2 | 2x | 2.85(1)  |
|     |           |    |          |    | N1 | 2x | 2.922(4) |
|     |           |    |          |    | N2 | 2x | 2.937(9) |
|     |           |    |          |    | O1 | 1x | 3.132(3) |
|     |           |    |          |    | O2 | 2x | 3.140(7) |

**Table S7** Interatomic anion-cation distances of Cr<sub>3</sub>\_HH266,  $R\bar{3}m$  after dynamical refinement.

| Atom 1 | Atom 2 | Count | d 1,2 (Å) |
|--------|--------|-------|-----------|
| Sn1    | O2     | 3x    | 2.042(6)  |
|        | N2     | 3x    | 2.144(7)  |
| Ge1    | N2     | 3x    | 1.874(7)  |
|        | N1     | 1x    | 1.911(9)  |
| Ge2    | O1     | 2x    | 1.936(5)  |
|        | N2     | 4x    | 2.031(7)  |
| Ge3    | O2     | 4x    | 1.957(5)  |
|        | N1     | 2x    | 1.985(4)  |

**Table S8** Interatomic cation-cation and anion-anion distances of Cr3\_HH266,  $R\bar{3}m$ .

| Atom 1 | Atom 2 | Count | d 1,2 (Å) | Atom 1 | Atom 2 | Count | d 1,2 (Å) |
|--------|--------|-------|-----------|--------|--------|-------|-----------|
| Sn1    | Ge2    | 3x    | 3.139(2)  | N2     | O1     | 1x    | 2.67(1)   |
|        | Ge1    | 3x    | 3.493(1)  |        | N2     | 2x    | 2.74(1)   |
|        | Ge3    | 6x    | 3.575(1)  |        | O1     | 2x    | 2.936(6)  |
| Ge1    | Ge3    | 3x    | 3.404(3)  |        | O2     | 2x    | 2.969(8)  |
|        | Ge2    | 6x    | 3.406(2)  |        | N2     | 2x    | 3.00(1)   |
|        | Sn1    | 3x    | 3.493(1)  |        | N1     | 1x    | 3.043(9)  |
|        | Ge1    | 1x    | 3.498(5)  |        | N2     | 2x    | 3.104(7)  |
| Ge2    | Ge2    | 4x    | 2.923     | O2     | N1     | 1x    | 2.643(9)  |
|        | Sn1    | 2x    | 3.139(2)  |        | O2     | 2x    | 2.758(8)  |
|        | Ge1    | 4x    | 3.406(2)  |        | O2     | 2x    | 2.776(8)  |
| Ge3    | Ge3    | 4x    | 2.923     |        | N1     | 2x    | 2.925(3)  |
|        | Ge1    | 2x    | 3.404(3)  |        | N2     | 2x    | 2.969(8)  |
|        | Sn1    | 4x    | 3.575(1)  |        | O2     | 2x    | 3.088(8)  |
|        |        |       |           |        | O1     | 1x    | 3.13(1)   |
|        |        |       |           | O1     | N2     | 3x    | 2.67(1)   |
|        |        |       |           |        | N2     | 6x    | 2.936(6)  |
|        |        |       |           |        | O2     | 3x    | 3.13(1)   |
|        |        |       |           | N1     | O2     | 3x    | 2.643(9)  |
|        |        |       |           |        | O2     | 6x    | 2.925(3)  |
|        |        |       |           |        | N2     | 3x    | 3.043(9)  |

**Table S9** Interatomic anion-cation distances of Cr4\_HH266,  $R\bar{3}m$  after dynamical refinement.

| Atom 1 | Atom 2 | Count | d 1,2 (Å) |
|--------|--------|-------|-----------|
| Sn1    | O2     | 3x    | 2.067(6)  |
|        | N2     | 3x    | 2.175(6)  |
| Ge1    | N2     | 3x    | 1.862(7)  |

|     |    |    |          |
|-----|----|----|----------|
|     | N1 | 1x | 1.889(8) |
| Ge2 | O1 | 2x | 1.937(4) |
|     | N2 | 4x | 2.025(7) |
| Ge3 | O2 | 4x | 1.940(5) |
|     | N1 | 2x | 1.995(4) |

**Table S10** Interatomic cation-cation and anion-anion distances of Cr4\_HH266,  $R\bar{3}m$  after dynamical refinement.

| Atom 1 | Atom 2 | Count | d 1,2 (Å) | Atom 1 | Atom 2 | Count | d 1,2 (Å) |
|--------|--------|-------|-----------|--------|--------|-------|-----------|
| Sn1    | Ge2    | 3x    | 3.140(2)  | N2     | O1     | 1x    | 2.666(9)  |
|        | Ge1    | 3x    | 3.4919(9) |        | N2     | 2x    | 2.78(1)   |
|        | Ge3    | 6x    | 3.574(1)  |        | O1     | 2x    | 2.933(6)  |
| Ge1    | Ge3    | 3x    | 3.401(3)  |        | N2     | 2x    | 2.948(7)  |
|        | Ge2    | 6x    | 3.408(2)  |        | O2     | 2x    | 3.013(84) |
|        | Sn1    | 3x    | 3.4919(9) |        | N1     | 1x    | 3.034(9)  |
|        | Ge1    | 1x    | 3.505(4)  |        | N2     | 2x    | 3.068(7)  |
| Ge2    | Ge2    | 4x    | 2.9230    | O2     | N1     | 1x    | 2.632(9)  |
|        | Sn1    | 2x    | 3.140(2)  |        | O2     | 2x    | 2.723(8)  |
|        | Ge1    | 4x    | 3.408(2)  |        | O2     | 2x    | 2.763(8)  |
| Ge3    | Ge3    | 4x    | 2.9230    |        | N1     | 2x    | 2.925(3)  |
|        | Ge1    | 2x    | 3.401(3)  |        | N2     | 2x    | 3.013(8)  |
|        | Sn1    | 4x    | 3.574(1)  |        | O2     | 2x    | 3.123(8)  |
|        |        |       |           |        | O2     | 1x    | 3.130(9)  |
|        |        |       |           | O1     | N2     | 3x    | 2.666(9)  |
|        |        |       |           |        | N2     | 6x    | 2.933(6)  |
|        |        |       |           |        | O2     | 3x    | 3.130(9)  |
|        |        |       |           | N1     | O2     | 3x    | 2.632(9)  |
|        |        |       |           |        | O2     | 6x    | 2.925(3)  |

|  |  |    |    |          |
|--|--|----|----|----------|
|  |  | N2 | 3x | 3.034(9) |
|--|--|----|----|----------|

**Table S11** Acquisition details of the ADT measurements.

|                         | Cr1_HH228     | Cr2_HH266     | Cr3_HH266     | Cr4_HH266     |
|-------------------------|---------------|---------------|---------------|---------------|
| TEM                     | Tecnai F30 ST | Tecnai F30 ST | Tecnai F30 ST | Tecnai F30 ST |
| Wavelength (Å)          | 0.0197        | 0.0197        | 0.0197        | 0.0197        |
| Precession angle (deg.) | 1             | 0.93          | 0.93          | 0.93          |
| Tilt step (deg.)        | 1             | 1             | 1             | 1             |
| No of frames            | 131           | 121           | 121           | 71            |
| Starting angle (deg.)   | -70           | -60           | -60           | -40           |
| Beam size (nm)          | 200           | 200           | 200           | 200           |
| Camera length (mm)      | 750           | 560           | 1000          | 560           |

**Table S12** Details of the dynamical refinements

|                                       | Cr1_HH228  | Cr2_HH266  | Cr3_HH266  | Cr4_HH266  |
|---------------------------------------|------------|------------|------------|------------|
| B(iso) (Å <sup>2</sup> )              | -0.025     | -0.532     | -0.154     | 0.382      |
| g(max) (Å <sup>-1</sup> )             | 2          | 1.5        | 1.6        | 1.8        |
| smax(matrix)                          | 0.01       | 0.01       | 0.01       | 0.01       |
| smax(refine)                          | 0.1        | 0.1        | 0.1        | 0.1        |
| Limit on Rsg                          | 0.25       | 0.3        | 0.35       | 0.4        |
| D(sg)min                              | 0.0015     | 0          | 0          | 0          |
| Number of integration steps           | 150        | 120        | 120        | 120        |
| Calculated crystal thickness (Å)      | 497(3)     | 584(6)     | 248(3)     | 177(4)     |
| Completeness (all)                    | 98.74%     | 93.9%      | 98.89%     | 99.64%     |
| Used reflections all(obs) (obs: I>3σ) | 2989(2576) | 2369(2275) | 1734(1577) | 2279(1504) |
| Parameters                            | 162        | 140        | 148        | 88         |
| Goodness of fit (obs)                 | 3.59       | 4.91       | 5.22       | 4.38       |
| Goodness of fit (all)                 | 3.37       | 4.83       | 5.01       | 3.65       |

|                  |             |             |             |             |
|------------------|-------------|-------------|-------------|-------------|
| R(obs) / wR(obs) | 9.42/10.53  | 11.25/13.33 | 11.72/13.79 | 14.52/16.51 |
| R(all) / wR(all) | 10.01/10.64 | 11.58/13.37 | 12.43/13.87 | 15.91/16.24 |

**Table S13** Details of the kinematical refinements

|                                          | Cr1_HH228   | Cr2_HH266   | Cr3_HH266   | Cr4_HH266   |
|------------------------------------------|-------------|-------------|-------------|-------------|
| R <sub>int</sub> (%)                     | 32.88       | 23.34       | 32.31       | 17.2        |
| B(iso) (Å <sup>2</sup> )                 | -1.08       | -1.27       | -1.09       | -0.65       |
| Completeness (%)                         | 86.6        | 94.9        | 90.8        | 96.6        |
| Used reflections all(obs)<br>(obs: I>3σ) | 802(788)    | 872(465)    | 355(342)    | 513(502)    |
| Parameters                               | 31          | 31          | 17          | 17          |
| Goodness of fit (obs)                    | 13.84       | 5.42        | 30.57       | 18.47       |
| goodness of fit (all)                    | 13.72       | 4.1         | 29.98       | 18.27       |
| R(obs) / wR(all)                         | 19.41/21.28 | 21.28/24.61 | 30.95/38.14 | 24.31/30.31 |
| Resolution (Å)                           | 0.5         | 0.5         | 0.71        | 0.625       |

**Table S14** Anisotropic displacement parameters after dynamical refinement of Cr1\_HH228, *P*6<sub>3</sub>*mc*

|     | U11       | U22       | U33       | U12       | U13        | U23        |
|-----|-----------|-----------|-----------|-----------|------------|------------|
| Sn1 | 0.0074(5) | 0.0074(5) | 0.0062(6) | 0.0037(3) | 0          | 0          |
| Ge1 | 0.0057(7) | 0.0057(7) | 0.0044(8) | 0.0028(4) | 0          | 0          |
| Ge2 | 0.0051(4) | 0.0051(4) | 0.0066(5) | 0.0034(5) | 0.0002(2)  | -0.0002(2) |
| N1  | 0.009(3)  | 0.009(3)  | 0.002(4)  | 0.005(2)  | 0          | 0          |
| N2  | 0.006(2)  | 0.006(2)  | 0.002(2)  | 0.002(2)  | -0.0029(9) | 0.0029(9)  |
| O1  | 0.002(2)  | 0.002(2)  | 0.004(3)  | 0.001(1)  | 0          | 0          |
| O2  | 0.011(2)  | 0.011(2)  | 0.013(2)  | 0.009(2)  | 0.0021(8)  | -0.0021(8) |

**Table S15** Details of the structure solution using SIR2014

|  | Cr1_HH228 | Cr4_HH266 |
|--|-----------|-----------|
|  |           |           |

|                          |       |       |
|--------------------------|-------|-------|
| Resolution (Å)           | 0.8   | 0.8   |
| Completeness (%)         | 100   | 98.02 |
| Ind. reflections         | 136   | 248   |
| B(iso) (Å <sup>2</sup> ) | -1.61 | -0.27 |
| R(int) (%)               | 30.63 | 20.64 |

**Table S16** Bond valence sums of the Nolanite type phase calculated from Datasets Cr1\_HH228 and Cr2\_HH266

|       | Cr1_HH228 | Cr2_HH266 |
|-------|-----------|-----------|
| Sn1   | 3.96(2)   | 3.94(4)   |
| Gesn1 |           | 2.62(4)   |
| Ge1   | 3.86(2)   | 3.90(5)   |
| Ge2   | 3.833(16) | 4.04(3)   |
| N1    | 3.10(2)   | 3.23(5)   |
| N2    | 3.027(17) | 3.12(3)   |
| O1    | 1.787(10) | 1.86(2)   |
| O2    | 1.783(13) | 1.84(2)   |

The bond valence sum of Gesn1 is lower because its position is mainly occupied by Sn. We suspect that the interatomic distances of this position are locally shorter if a Ge atom occupies this position. Unfortunately, due to the small amount of Ge on that position and the quality of the data, this difference cannot be resolved in the refinement.

**Table S17** Bond valence sums of the 6R polytype calculated from the datasets Cr3\_HH266 and Cr4\_HH266

|     | Cr3_HH266 | Cr4_HH266 |
|-----|-----------|-----------|
|     | 6         | 6         |
| Sn1 | 4.28(4)   | 3.91(3)   |
| Ge1 | 3.97(4)   | 4.12(4)   |
| Ge2 | 3.86(3)   | 3.90(3)   |
| Ge3 | 3.77(2)   | 3.84(2)   |



|    |           |           |
|----|-----------|-----------|
| N2 | 3.07(3)   | 3.06(3)   |
| O2 | 1.838(18) | 1.829(17) |
| O1 | 1.798(13) | 1.791(11) |
| N1 | 3.18(3)   | 3.18(3)   |

**Table S18** Used bond valence parameters with references

|                  |                 | BV-rho | BV-B  | Source                      |
|------------------|-----------------|--------|-------|-----------------------------|
| Sn <sup>4+</sup> | O <sup>2-</sup> | 1.946  | 0.274 | (Gagné & Hawthorne, 2015)   |
| Sn <sup>4+</sup> | N <sup>3-</sup> | 2.03   | 0.35  | Brown private communication |
| Ge <sup>4+</sup> | N <sup>3-</sup> | 1.88   | 0.37  | (Brese & O'Keeffe, 1991)    |
| Ge <sup>4+</sup> | O <sup>2-</sup> | 1.75   | 0.363 | (Gagné & Hawthorne, 2015)   |

#### References

Brese, N. E. & O'Keeffe, M. (1991). *Acta Crystallogr B Struct Sci.* 47, 192–197, doi:10.1107/S0108768190011041.

Brown, I. D. (2020). Bond valence parameters, <https://www.iucr.org/resources/data/datasets/bond-valence-parameters>.

Gagné, O. C. & Hawthorne, F. C. (2015). *Acta crystallographica Section B, Structural science, crystal engineering and materials.* 71, 562–578, doi:10.1107/S2052520615016297.
